# Supplementary material for: Cloning and characterization of TaSnRK2.3, a novel SnRK2 gene in common wheat
Source: PubMed Central journal article supplement — J Exp Bot. 2013 Mar 11;64(7):2063–80. doi: 10.1093/jxb/ert072 (PMC3638835; doi:10.1093/jxb/ert072), 2013-03-11
Supplement: supp_ert072_jexbot092049_file001.pdf [file supp_ert072_jexbot092049_file001.pdf]

## Cloning and characterization of *TaSnRK2.3*, a novel SnRK2 gene in common wheat

Shanjun Tian<sup>1,2,§</sup>, Xinguo Mao<sup>1,§</sup>, Hongying Zhang<sup>1</sup>, Shuangshuang Chen<sup>1</sup>, Chaochao Zhai<sup>1</sup>, Shimin Yang<sup>2</sup>, Ruilian Jing<sup>1,\*</sup>

<sup>1</sup>. The Key Laboratory of Crop Germplasm Resource and Enhancement, MOA; National Key Facility for Crop Gene Resources and Genetic Improvement, Institute of Crop Science, Chinese Academy of Agricultural Sciences, Beijing 100081, China

<sup>2</sup>. College of Agronomy, Sichuan Agricultural University, Yaan 625014, Sichuan, China

§ These authors contributed equally to this work

\*Corresponding author

Contact Information

Ruilian Jing

Institute of Crop Science

Chinese Academy of Agricultural Sciences

Beijing 100081

China

Tel/Fax: 86-10-82105829

Email: [jingrl@caas.net.cn](mailto:jingrl@caas.net.cn)

**Table S1 Plant materials used for identification of genomic origins**<sup>1</sup> Accession numbers are for the Chinese National Gene Bank, CAAS.<sup>2</sup> Refers to the country of origin.

| Species                | Accession No. <sup>1</sup> | Genome | Origin <sup>2</sup> | Species              | Accession No. | Genome | Origin |
|------------------------|----------------------------|--------|---------------------|----------------------|---------------|--------|--------|
| <i>T. urartu</i>       | UR201                      | AA     | Lebanon             | <i>Ae. tauschii</i>  | Y92           | DD     | China  |
| <i>T. urartu</i>       | UR204                      | AA     | Lebanon             | <i>Ae. tauschii</i>  | Y215          | DD     | Mexico |
| <i>T. urartu</i>       | UR206                      | AA     | Lebanon             | <i>T. dicoccoide</i> | DS1           | AABB   | France |
| <i>T. urartu</i>       | UR209                      | AA     | Syria               | <i>T. dicoccoide</i> | DS6           | AABB   | German |
| <i>Ae. speltooides</i> | Y2003                      | SS     | Syria               | <i>T. dicoccoide</i> | DS10          | AABB   | Canada |
| <i>Ae. speltooides</i> | Y2009                      | SS     | Syria               | <i>T. dicoccum</i>   | DM 51         | AABB   | Canada |
| <i>Ae. speltooides</i> | Y2017                      | SS     | Syria               | <i>T. aestivum</i>   | Hanxuan 10    | AABBDD | China  |
| <i>Ae. speltooides</i> | Y2021                      | SS     | Iran                | <i>T. aestivum</i>   | Lumai 14      | AABBDD | China  |
| <i>Ae. tauschii</i>    | AE38                       | DD     | Iran                | <i>T. aestivum</i>   | Opata 85      | AABBDD | Mexico |
| <i>Ae. tauschii</i>    | AE46                       | DD     | China               | <i>T. aestivum</i>   | W7984         | AABBDD | Mexico |

**Table S2 oligonucleotides for genetic assays**

| Name  | Sequence                            | Experimental purpose                |
|-------|-------------------------------------|-------------------------------------|
| GTF   | 5' -CCGTGGAATGTTTGTTTCAGTAA-3'      | Genomic sequence amplification      |
| GTR   | 5' -GTAGGTCTCCCCCTCGGCT-3'          |                                     |
| GBF   | 5' -TTCACAGTCGGTTTCGTTTCG-3'        |                                     |
| GBR   | 5' -CCGTGGAATGTTTGTTTCAGTAA-3'      |                                     |
| AGSF  | 5' -GTTGGTACTCCAGCATACATAGCGC-3'    | Chromosome localization             |
| BGSF  | 5' -TAAGTACCGCTTATGACAATCTGTGGTT-3' |                                     |
| DGSF  | 5' -ACTGATGGTTACTGCTATGTTTCAAGTC-3' |                                     |
| GSR1  | 5' -TCAAGTGCACAAGACGTGCATTC-3'      |                                     |
| GSR2  | 5' -GGAATGGAGTATTGCACGCCA-3'        |                                     |
| CAPSF | 5' -TGTGTGTCCTCCAGAAAGC-3'          | Gene ( <i>TaSnRK2.3-B</i> ) mapping |
| CAPSR | 5' -CAGAAAGACCATATTATAGCAAGC-3'     |                                     |
| PF    | 5'-GAATCATGGTCATTAATACTGCCATA-3'    | Promoter amplification              |
| PR    | 5'- CGTGGTGATCCTTGATGATGTTG-3'      |                                     |
| DF    | 5'-AGGCCCCCGGCCGAAAT-3'             | qRT-PCR analysis                    |
| QR    | 5'-CAGACAGACCGTATGAACTGCGAT-3'      |                                     |

**Table S3 Comparison of *cis*-acting elements identified in the promoter regions of *TaSnRK2.3s***

| Name                   | ProA   | ProB | ProD | Sequence function                                                         |
|------------------------|--------|------|------|---------------------------------------------------------------------------|
|                        | Number |      |      |                                                                           |
| 5´ UTR Py-rich stretch | 1      | 1    | 1    | <i>cis</i> -acting element conferring high transcription levels           |
| CAAT-box               | 25     | 29   | 23   | common <i>cis</i> -acting element in promoter and enhancer regions        |
| TATA-box               | 26     | 27   | 31   | core promoter element around -30 of transcription start                   |
| ABRE                   | 9      | 8    | 11   | <i>cis</i> -acting element involved in the abscisic acid responsiveness   |
| Motif lib              | 1      | 1    | 1    | abscisic acid responsive element                                          |
| CE3                    | 1      | 0    | 1    | <i>cis</i> -acting element involved in ABA and VP1 responsiveness         |
| C-repeat/DRE           | 1      | 1    | 1    | regulatory element involved in cold- and dehydration-responsiveness       |
| CCAAT-box              | 1      | 1    | 0    | MYBHv1 binding site                                                       |
| HSE                    | 0      | 1    | 1    | <i>cis</i> -acting element involved in heat stress responsiveness         |
| MBS                    | 0      | 2    | 1    | MYB binding site involved in drought-inducibility                         |
| TC-rich repeats        | 0      | 0    | 1    | <i>cis</i> -acting element involved in defense and stress responsiveness  |
| GARE-motif             | 2      | 1    | 0    | gibberellin-responsive element                                            |
| TCA-element            | 2      | 2    | 3    | <i>cis</i> -acting element involved in salicylic acid responsiveness      |
| CGTCA-motif            | 3      | 0    | 4    | <i>cis</i> -acting regulatory element involved in the MeJA-responsiveness |
| TGACG-motif            | 3      | 4    | 4    | <i>cis</i> -acting regulatory element involved in the MeJA-responsiveness |
| Circadian              | 0      | 2    | 2    | <i>cis</i> -acting regulatory element involved in circadian control       |

The *cis*-elements were identified in the upstream of promoters (1500bp)

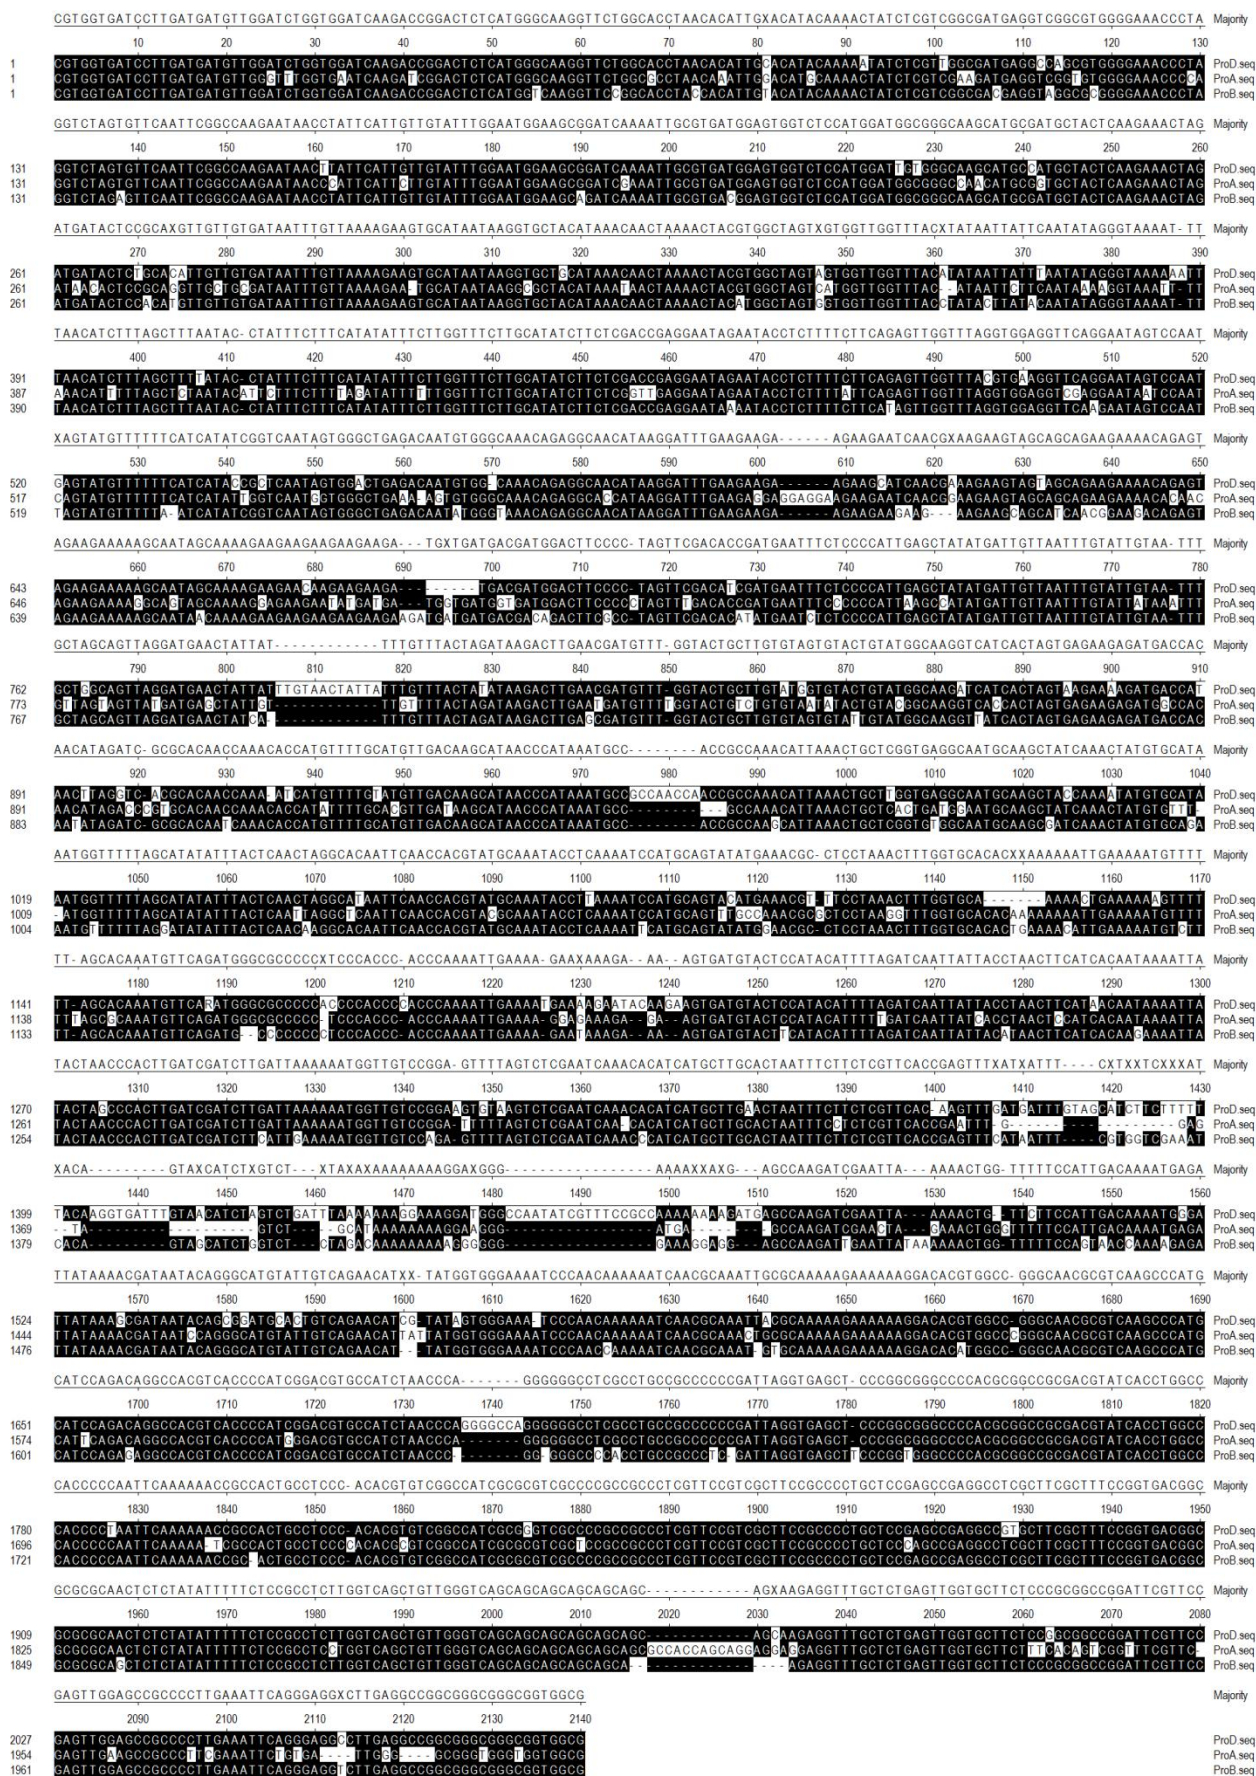

Fig. S1 Sequence alignment of the promoter regions for *TaSnRK2.3s*

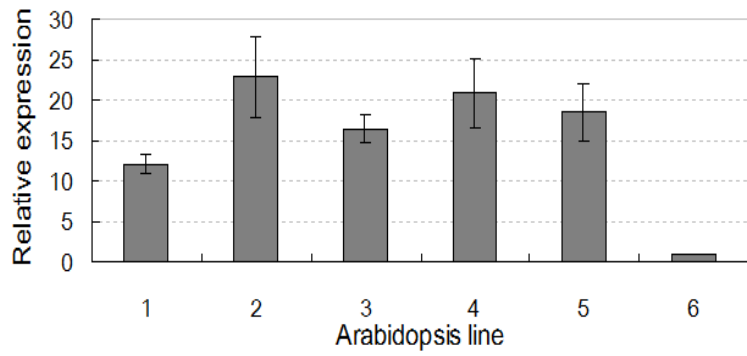

**Fig. S2 Gene expression levels of *TaSnRK2.3* in different transgenic lines**

1-6: six individual *TaSnRK2.3* transgenic lines, values are the means  $\pm$  SE.

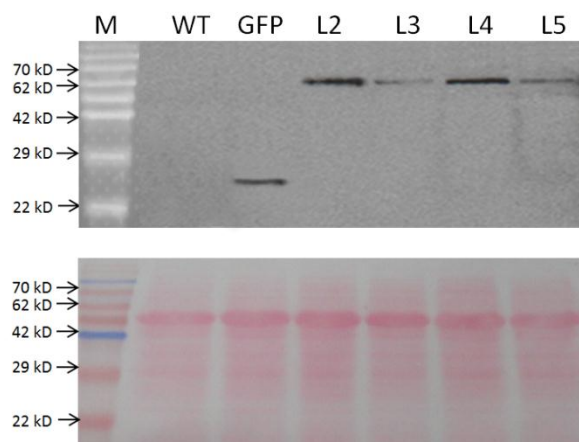

**Fig. S3 Protein levels for *TaSnRK2.3* in transgenic lines**

M, visible protein marker; WT, wild type; GFP, GFP transgenics; L2-5, transgenic lines.
